# Supplementary material for: Exonization of the LTR transposable elements in human genome
Source: PubMed Central journal article supplement (PMC2008291; doi:10.1186/1471-2164-8-291), 2007-08-28
Supplement: 1471-2164-8-291-S1.pdf [file 1471-2164-8-291-S1.pdf]

**Supplementary Table 1: Features of LRTS-derived protein coding exons.**

|                                     | RefSeq gene <sup>1</sup> | strand (gene/LRTS) <sup>2</sup> | exon no/total exon <sup>3</sup> | exon length, nt <sup>4</sup> | protein length, aa | LRTS length, nt <sup>5</sup> | LRTS sub-family | LRTS class/family <sup>6</sup> | Gene annotation                                                                  | GO descriptions <sup>7</sup>                                                                                    | GenBank mRNAs with exonized LRTS <sup>8</sup> | ESTs with exonized LRTS <sup>9</sup>                       | sequences in place of splice sites flanking orthologous exons <sup>10</sup> |
|-------------------------------------|--------------------------|---------------------------------|---------------------------------|------------------------------|--------------------|------------------------------|-----------------|--------------------------------|----------------------------------------------------------------------------------|-----------------------------------------------------------------------------------------------------------------|-----------------------------------------------|------------------------------------------------------------|-----------------------------------------------------------------------------|
| <b>internal protein coding exon</b> |                          |                                 |                                 |                              |                    |                              |                 |                                |                                                                                  |                                                                                                                 |                                               |                                                            |                                                                             |
| 1                                   | NM_005799*               | +/-                             | 34/36*                          | 90(30)                       | 1582               | 368                          | MSTD            | MaLR <sup>1</sup>              | InaD-like protein ( <i>INADL</i> ), transcript variant 3                         | protein binding (protein-protein interaction mediated by PDZ domains)                                           | AJ224748                                      | N/A                                                        | * GT/AG                                                                     |
| 2                                   | NM_198712*               | -/-                             | 4/6*                            | 70                           | 400                | 265                          | MSTA            | MaLR <sup>1</sup>              | prostaglandin E receptor 3 (subtype EP3) ( <i>PTGER3</i> ), transcript variant 2 | prostaglandin E receptor activity, ligand-dependent nuclear receptor activity, rhodopsin-like receptor activity | D86097                                        | N/A                                                        | * donor (all = AT); acceptor (c & h = AG, r = TG)                           |
| 3                                   | NM_198713*               | -/-                             | 3/5*                            | 76                           | 393                | 265                          | MSTA            | MaLR <sup>1</sup>              | prostaglandin E receptor 3 (subtype EP3) ( <i>PTGER3</i> ), transcript variant 3 | prostaglandin E receptor activity, ligand-dependent nuclear receptor activity, rhodopsin-like receptor activity | D86098, AY429108                              | N/A                                                        | * donor (all = GT); acceptor (c & h = AG, r = TG)                           |
| 4                                   | NM_020161*               | -/-                             | 2/3                             | 73                           | 150                | 382                          | MSTB2           | MaLR <sup>1</sup>              | hypothetical protein DKFZp547H025 ( <i>DKFZp547H025</i> )                        | folic acid binding, reduced folate carrier activity                                                             | AK055355, AL359944, CR749679                  | DA513601                                                   | * donor (all = GT); acceptor (c & h = AG, r = GG)                           |
| 5                                   | NM_007072*               | +/-                             | 8/10                            | 51(17)                       | 414                | 217                          | LTR33           | ERVL <sup>1</sup>              | HERV-H LTR-associating 2 ( <i>HHLA2</i> )                                        | unknown                                                                                                         | BC035971, AF126162, AK000692, AK027132        | DB232201, BG283385                                         | GT/AG                                                                       |
| 6                                   | NM_001025468             | +/+                             | 2/3                             | 95                           | 97                 | 408                          | MSTA            | MaLR <sup>1</sup>              | chromosome 3 open reading frame 47 ( <i>C3orf47</i> )                            | undefined                                                                                                       | BC093941, AK091470, BC101739                  | DA499220, BF514892, AL040547, BM709191                     | * GT/AG                                                                     |
| 7                                   | NM_145027*               | -/+                             | 20/23                           | 51(17)                       | 814                | 361                          | MLT1A0          | MaLR <sup>1</sup>              | kinesin family member 6 ( <i>KIF6</i> )                                          | ATP binding, nucleotide binding, microtubule motor activity, microtubule-based movement                         | AL832634, BC022074, AK131471,                 | CA314029, BM696570, B1118088, BG189781, CV024391, BG715118 | GT/AG                                                                       |

Supplementary Table 1 (continued)

|    |            |     |       |        |     |     |        |                   |                                                                           |                                                                                                           |                                          |                                                                                |                                                   |
|----|------------|-----|-------|--------|-----|-----|--------|-------------------|---------------------------------------------------------------------------|-----------------------------------------------------------------------------------------------------------|------------------------------------------|--------------------------------------------------------------------------------|---------------------------------------------------|
| 8  | NM_052962* | -/- | 4/7*  | 96(32) | 263 | 445 | MSTB2  | MaLR <sup>1</sup> | interleukin 22 receptor, alpha 2 ( <i>IL22RA2</i> ), transcript variant 1 | interleukin-22 receptor activity, hematopoietin/interferon-class (D200-domain) cytokine receptor activity | AY040567, AJ313162, AY358737             | N/A                                                                            | * donor (c & h = GT, r = AT); acceptor (all = AG) |
| 9  | NM_024728* | +/- | 13/15 | 78(26) | 434 | 519 | MLT1E2 | MaLR <sup>1</sup> | chromosome 7 open reading frame 10 ( <i>C7orf10</i> )                     | transferase activity                                                                                      | AK021870, BC098318                       | BG678361, CN259576                                                             | GT/AG                                             |
| 10 | NM_174930  | +/+ | 5/6   | 89     | 134 | 387 | MSTA   | MaLR <sup>1</sup> | postmeiotic segregation increased 2-like 5 ( <i>PMS2L5</i> )              | ATP binding, damaged DNA binding (in mismatch repair process)                                             | BC027480, D38436, D38501, D38502, D38439 | BQ049786, DA486906, BE883788, AA621085, CA442493, AA411808, AA917605, AA282042 | * donor (c & h = GT, r = AT); acceptor (all = AG) |
| 11 | NM_002679  | -/- | 7/8   | 89     | 297 | 387 | MSTA   | MaLR <sup>1</sup> | postmeiotic segregation increased 2-like 2 ( <i>PMS2L2</i> )              | unknown (in mismatch repair process)                                                                      | AB017005                                 | BM547367, BE703998, BE703901, BE701175, DR001682, AU120696, DR007875, BE163029 | * donor (c & h = GT, r = AT); acceptor (all = AG) |
| 12 | NM_002679  | -/- | 2/8   | 89     | 297 | 387 | MSTA   | MaLR <sup>1</sup> | postmeiotic segregation increased 2-like 2 ( <i>PMS2L2</i> )              | unknown (in mismatch repair process)                                                                      | AB017005                                 | BM547367, BE703998, BE703901, BE701175, DR001682, DR007875, BE163029, BQ049786 | * donor (c & h = GT, r = AT); acceptor (all = AG) |
| 13 | NM_002679  | -/- | 7/8   | 89     | 297 | 387 | MSTA   | MaLR <sup>1</sup> | postmeiotic segregation increased 2-like 2 ( <i>PMS2L2</i> )              | unknown (in mismatch repair process)                                                                      | AB017005                                 | BM547367, BE703998, BE703901, BE701175, DR001682, DR007875, BE163029, BQ049786 | * donor (c & h = GT, r = AT); acceptor (all = AG) |

Supplementary Table 1 (continued)

|    |                   |     |       |        |     |     |        |                   |                                                                                                    |                                                                                                                                              |                                                                                |                                                                                |                                                   |
|----|-------------------|-----|-------|--------|-----|-----|--------|-------------------|----------------------------------------------------------------------------------------------------|----------------------------------------------------------------------------------------------------------------------------------------------|--------------------------------------------------------------------------------|--------------------------------------------------------------------------------|---------------------------------------------------|
| 14 | NM_002679         | -/- | 2/8   | 89     | 297 | 383 | MSTA   | MaLR <sup>1</sup> | postmeiotic segregation increased 2-like 2 ( <i>PMS2L2</i> )                                       | unknown (in mismatch repair process)                                                                                                         | AB017005, AB017007                                                             | BE703998, BE703901, DR001682, AU120696, BG740816, DR007875, BE163029, BQ049786 | * donor (c & h = GT, r = AT); acceptor (all = AG) |
| 15 | NM_032958*        | -/- | 3/8*  | 87(29) | 116 | 384 | MSTA   | MaLR <sup>1</sup> | DNA directed RNA polymerase II polypeptide J-related gene ( <i>POLR2J2</i> ), transcript variant 2 | DNA binding, transferase activity, protein dimerization activity, DNA-directed RNA polymerase activity (a subunit of RNA polymerase II)      | BC056864, BC086857, BC071870, CR606303, CR624568, CR596358, CR614811, AJ277740 | BM915750, BM559191, BG177266, DA093808, AL535064, DA239331, DA474156, AL556716 | * donor (c & h = GT, r = AT); acceptor (all = AG) |
| 16 | NM_001023564* +/- |     | 4/5   | 94     | 218 | 419 | MSTC   | MaLR <sup>1</sup> | cathepsin L-like protein ( <i>HCTSL-s</i> )                                                        | cysteine-type peptidase activity                                                                                                             | AJ851862                                                                       | N/A                                                                            | no orthologous exonic sequence in chimpanzee      |
| 17 | NM_017418*        | +/- | 6/8   | 74     | 70  | 371 | MSTD   | MaLR <sup>1</sup> | deleted in esophageal cancer 1 ( <i>DEC1</i> )                                                     | unknown (a candidate tumor suppressor gene for esophageal squamous cell carcinomas located in a region commonly deleted in these carcinomas) | AB022761                                                                       | N/A                                                                            | GT/AG                                             |
| 18 | NM_001010910* +/- |     | 2/3   | 85     | 102 | 203 | MLT1J  | MaLR <sup>1</sup> | hypothetical LOC399706 ( <i>LOC399706</i> )                                                        | iron ion binding, electron transporter activity                                                                                              | AK097673                                                                       | DB045405                                                                       | no orthologous exonic sequence in rhesus monkey   |
| 19 | NM_001548         | +/+ | 2/3*  | 109    | 41  | 402 | MLT1B  | MaLR <sup>1</sup> | interferon-induced protein with tetratricopeptide repeats 1 ( <i>IFIT1</i> ), transcript variant 2 | binding, immune response (interferon-induced protein)                                                                                        | AK092813                                                                       | DB003897, DA380195, DA671459, DA672179, DA599173, DA676435, DA540285, DA599173 | donor (c & h = GT, r = AT); acceptor (all = AG)   |
| 20 | NM_015430*        | -/+ | 7/12* | 51(17) | 737 | 348 | MLT1A0 | MaLR <sup>1</sup> | regeneration associated muscle protease ( <i>DKFZP586H2123</i> ), transcript variant 1             | trypsin activity, peptidase activity, calcium ion binding, chymotrypsin activity                                                             | BC038457, BC089434, AK027841                                                   | DA475973, BG403264, DA543024, BX439313                                         | GT/AG                                             |
| 21 | NM_001001681* +/- |     | 3/7   | 104    | 129 | 395 | MSTD   | MaLR <sup>1</sup> | FLJ45300 protein ( <i>FLJ45300</i> )                                                               | undefined                                                                                                                                    | AK127233                                                                       | DA313959                                                                       | * GT/AG                                           |

**Supplementary Table 1** (continued)

|    |              |     |       |         |      |      |        |                   |                                                                               |                                                                                                                                                                                                                                                                    |                    |                    |                                                                 |
|----|--------------|-----|-------|---------|------|------|--------|-------------------|-------------------------------------------------------------------------------|--------------------------------------------------------------------------------------------------------------------------------------------------------------------------------------------------------------------------------------------------------------------|--------------------|--------------------|-----------------------------------------------------------------|
| 22 | NM_173580*   | +/- | 2/3   | 107     | 122  | 133  | MER21C | ERV1 <sup>1</sup> | chromosome 11 open reading frame 44 ( <i>C11orf44</i> )                       | undefined                                                                                                                                                                                                                                                          | AK096377           | DA748198           | no orthologous exonic sequence in rhesus monkey                 |
| 23 | NM_183378    | -/+ | 26/28 | 107     | 1134 | 436  | MER34B | ERV1 <sup>1</sup> | ovochymase 1 ( <i>OVCH1</i> )                                                 | peptidase activity, serine-type endopeptidase activity                                                                                                                                                                                                             | BN000128           | N/A                | * GT/AG                                                         |
| 24 | NM_031915*   | +/- | 5/15  | 36(12)  | 719  | 50   | MER34  | ERV1 <sup>1</sup> | SET domain, bifurcated 2 ( <i>SETDB2</i> )                                    | DNA binding, zinc ion binding, methyltransferase activity, histone-lysine N-methyltransferase activity (likely a histone H3 methyltransferase)                                                                                                                     | AF334407           | N/A                | GT/AG                                                           |
| 25 | NM_145019*   | +/- | 3/5   | 108(36) | 582  | 675  | LTR9   | ERV1 <sup>1</sup> | hypothetical protein FLJ30707 ( <i>FLJ30707</i> )                             | structural constituent of ribosome                                                                                                                                                                                                                                 | AK096364           | DA745625           | * donor (c & h & r = GT); acceptor (c & h = AG, r = deletion)   |
| 26 | NM_001014830 | -/+ | 3/5   | 75(25)  | 324  | 327  | MLT1A0 | MaLR <sup>1</sup> | hypothetical protein LOC196913 ( <i>LOC196913</i> )                           | undefined                                                                                                                                                                                                                                                          | AF390030           | DA935043, DA947999 | GT/AG                                                           |
| 27 | NM_033141*   | -/+ | 11/13 | 42(14)  | 1118 | 589  | MLT2B3 | ERVL <sup>1</sup> | mitogen-activated protein kinase kinase 9 ( <i>MAP3K9</i> )                   | ATP binding, nucleotide binding, transferase activity, MAP kinase activity, protein-tyrosine kinase activity, JUN kinase activity, JUN kinase kinase activity, protein homodimerization activity, protein serine/threonine kinase activity                         | AF251442, BX648924 | N/A                | GT/AG                                                           |
| 28 | NM_007319*   | +/- | 8/11* | 92      | 374  | 1701 | MER52A | ERV1 <sup>1</sup> | presenilin 1 (Alzheimer disease 3) ( <i>PSEN1</i> ), transcript variant I-374 | protein binding, Notch receptor processing, amyloid precursor protein catabolism (regulation amyloid precursor protein (APP) processing through their effects on a gamma-secretase, an enzyme that cleaves APP; involvement in the cleavage of the Notch receptor) | U40380, AF416717   | N/A                | no orthologous exonic sequences in chimpanzee and rhesus monkey |
| 29 | NM_020552*   | +/- | 2/5   | 67      | 105  | 129  | MLT1D  | MaLR <sup>1</sup> | T-cell leukemia/lymphoma 6 ( <i>TCL6</i> ), transcript variant TCL6b1         | unknown (a candidate gene for leukemogenesis)                                                                                                                                                                                                                      | AB035335           | BX390485           | donor (c & h = GT, r = GA); acceptor (all = AG)                 |

**Supplementary Table 1** (continued)

|    |               |     |        |         |      |      |          |                   |                                                                             |                                                                                                                                                                                                                                    |                                                                                            |                                                               |
|----|---------------|-----|--------|---------|------|------|----------|-------------------|-----------------------------------------------------------------------------|------------------------------------------------------------------------------------------------------------------------------------------------------------------------------------------------------------------------------------|--------------------------------------------------------------------------------------------|---------------------------------------------------------------|
| 30 | NM_020553*    | +/- | 5/8    | 67      | 119  | 129  | MLT1D    | MaLR <sup>1</sup> | T-cell leukemia/lymphoma 6 ( <i>TCL6</i> ), transcript variant TCL6c1       | unknown (a candidate gene AB035337 for leukemogenesis)                                                                                                                                                                             | BX390485                                                                                   | donor (c & h = GT, r = GA); acceptor (all = AG)               |
| 31 | NM_020554*    | +/- | 5/8    | 67      | 163  | 129  | MLT1D    | MaLR <sup>1</sup> | T-cell leukemia/lymphoma 6 ( <i>TCL6</i> ), transcript variant TCL6d1       | unknown (a candidate gene AB035338 for leukemogenesis)                                                                                                                                                                             | BX390485                                                                                   | donor(c & h = GT, r = GA); acceptor (all = AG)                |
| 32 | NM_005624*    | +/- | 4/5    | 120(40) | 150  | 390  | MLT1K    | MaLR <sup>1</sup> | chemokine (C-C motif) ligand 25 ( <i>CCL25</i> )                            | hormone activity, chemokine activity, chemotaxis, sensory perception, inflammatory response, G-protein coupled receptor protein signaling pathway                                                                                  | U86358<br>BX106823, AA295945                                                               | GT/AG                                                         |
| 33 | NM_005867*    | -/- | 2/3    | 102(34) | 118  | 364  | MLT2C1   | ERVL <sup>1</sup> | Down syndrome critical region gene 4 ( <i>DSCR4</i> )                       | unknown (contribution to the pathogenesis of many characteristics of Down syndrome, including morphological features, hypotonia, and mental retardation)                                                                           | AB000099, BC069729, BC096162, BC096163, BC096164<br>CB993317, AW664531, BX112350, CD243838 | GT/AG                                                         |
| 34 | NM_003159*    | +/+ | 19/21* | 84(28)  | 1030 | 398  | MLT1J    | MaLR <sup>1</sup> | cyclin-dependent kinase-like 5 ( <i>CDKL5</i> ), transcript variant I       | ATP binding, nucleotide binding, transferase activity, protein-tyrosine kinase activity, protein serine/ threonine kinase activity, protein amino acid phosphorylation (association with X-linked infantile spasm syndrome (ISSX)) | AY217744, Y15057, BC036091<br>N/A                                                          | no orthologous exon sequence in chimpanzee                    |
| 35 | NM_024332*    | +/- | 8/12*  | 75(25)  | 316  | 528  | MLT1J    | MaLR <sup>1</sup> | chromosome X open reading frame 53 ( <i>CXorf53</i> ), transcript variant 1 | unknown                                                                                                                                                                                                                            | BC002999, BC006540, AY438030, S68015<br>BU570969                                           | no orthologous exon sequences in chimpanzee and rhesus monkey |
| 36 | NM_207358*    | -/- | 4/10   | 118     | 139  | 1711 | HERV16   | ERVL <sup>2</sup> | hypothetical protein LOC339789 ( <i>LOC339789</i> )                         | undefined                                                                                                                                                                                                                          | BC043563, AK127578<br>BI911310                                                             | donor (all = GT); acceptor (c & h = AG, r = AT)               |
| 37 | NM_001004352* | +/+ | 4/7    | 187     | 141  | 5613 | HERVL-A2 | ERVL <sup>2</sup> | FLJ16323 protein ( <i>FLJ16323</i> )                                        | hydrolase activity, dUTP metabolism, nucleotide metabolism                                                                                                                                                                         | AK131322<br>N/A                                                                            | no orthologous exon sequence in chimpanzee                    |

Supplementary Table 1 (continued)

|    |            |     |      |        |     |      |           |                   |                                                                                                               |                                                             |                                                                                |                                                                                                                                            |                                              |
|----|------------|-----|------|--------|-----|------|-----------|-------------------|---------------------------------------------------------------------------------------------------------------|-------------------------------------------------------------|--------------------------------------------------------------------------------|--------------------------------------------------------------------------------------------------------------------------------------------|----------------------------------------------|
| 38 | NM_004052* | -/+ | 3/6  | 85     | 194 | 87   | HERV70    | ERV1 <sup>2</sup> | BCL2/adenovirus E1B 19kDa interacting protein 3 ( <i>BNIP3</i> ), nuclear gene encoding mitochondrial protein | induce apoptosis, anti-apoptosis, defense response to virus | BC009342, CR626676, BC021989, BC009342, AF002697, AK222626, BC067818, BC080643 | CR995431, BX377664, BX404184, BX361486, BX361092, BX402244, BM799844, BM906527, BX445440, BM460721                                         | GT/AG (GT position is not covered by HERV70) |
| 39 | NM_004052* | -/+ | 2/6  | 151    | 194 | 154  | HERV70    | ERV1 <sup>2</sup> | BCL2/adenovirus E1B 19kDa interacting protein 3 ( <i>BNIP3</i> ), nuclear gene encoding mitochondrial protein | induce apoptosis, anti-apoptosis, defense response to virus | BC009342, CR626676, BC021989, BC009342, AF002697, AK222626, BC067818, BC080643 | CR995431, BX377664, BX404184, BX361486, BX361092, BX402244, BM799844, BM906527, BM460721, BX333924                                         | GT/AG (GT position is not covered by HERV70) |
| 40 | NM_014317* | +/+ | 2/12 | 33(11) | 415 | 1493 | THE1D-int | MaLR <sup>2</sup> | prenyl (decaprenyl) diphosphate synthase, subunit 1 ( <i>PDSS1</i> )                                          | transferase activity, isoprenoid biosynthesis               | AK024802, AK223414, CR591586, AB210838, CR609440, BC063635, BC049211           | DA565436, BX404180, CB996378, AL558274, CN297657, CN297656, AL560834, BF982221, DA969880, BI761095, BI916825, BQ212558, DR155397, CB152847 | * GT/AG                                      |

**Supplementary Table 1 (continued)**

|                       |            |     |        |         |     |      |                 |                   |                                                                                                  |                                                                                                                            |                              |                                                                                                    |                                                                        |
|-----------------------|------------|-----|--------|---------|-----|------|-----------------|-------------------|--------------------------------------------------------------------------------------------------|----------------------------------------------------------------------------------------------------------------------------|------------------------------|----------------------------------------------------------------------------------------------------|------------------------------------------------------------------------|
| 41                    | NM_080661* | +/+ | 2/7    | 124     | 333 | 701  | MER57B-int      | ERV1 <sup>2</sup> | glycine-N-acyltransferase-like 1 ( <i>GLYATL1</i> )                                              | Acyltransferase activity, transferase activity                                                                             | BC008353, AK091965, AX747281 | DA082180, T80698, DA355423, BM924769, DA631846, BE265837, CA397661, CF122488                       | no orthologous exonic sequence in rhesus monkey                        |
| 42                    | NM_016488* | +/+ | 12/13* | 225(75) | 458 | 2904 | HERVK22         | ERVK <sup>2</sup> | periphilin 1 ( <i>PPHLN1</i> ), transcript variant 1                                             | keratinization (may play a role in epithelial differentiation and contribute to epidermal integrity and barrier formation) | AY039238                     | N/A                                                                                                | * GT/AG                                                                |
| 43                    | NM_015138* | +/+ | 14/18  | 58      | 585 | 85   | HERVIP10F       | ERV1 <sup>2</sup> | Rtf1, Paf1/RNA polymerase II complex component, homolog ( <i>S. cerevisiae</i> ) ( <i>RTF1</i> ) | undefined                                                                                                                  | D87440, BC015052             | CX783855, BQ421107, CN334996, DB063883, CB989235, BF795182, CN334990, AU127092, BQ230838, BQ354365 | GT/AG (T position is not covered by HERVIP10F)                         |
| 44                    | NM_015547* | +/+ | 16/17* | 153     | 607 | 3404 | MER9, HERVK9    | ERVK <sup>3</sup> | acyl-CoA thioesterase 11 ( <i>ACOT11</i> ), transcript variant 1                                 | acyl-CoA thioesterase activity, hydrolase activity, serine esterase activity                                               | AB014607, AF416921           | N/A                                                                                                | * GT/AG                                                                |
| 45                    | NM_016488* | +/+ | 11/13* | 101     | 458 | 1356 | LTR22A, HERVK22 | ERVK <sup>3</sup> | periphilin 1 ( <i>PPHLN1</i> ), transcript variant 1                                             | keratinization (may play a role in epithelial differentiation and contribute to epidermal integrity and barrier formation) | AY039238, BC025306           | BI258755, BM838224                                                                                 | * GT/AG                                                                |
| <b>first CDS exon</b> |            |     |        |         |     |      |                 |                   |                                                                                                  |                                                                                                                            |                              |                                                                                                    |                                                                        |
| 1                     | NM_144663* | -/- | 1/4    | 141(47) | 217 | 580  | LTR18B          | ERVL <sup>1</sup> | chromosome 11 open reading frame 40 ( <i>C11orf40</i> )                                          | undefined                                                                                                                  | AF439154                     | N/A                                                                                                | * donor (c & h = GT, r = GA), no flanking acceptor: first exon of gene |

**Supplementary Table 1 (continued)**

|                                   |                   |                                                                      |        |                |      |                       |                   |                                                             |                                                                                                         |                                                                                                                                                                                         |                                                                                         |                                    |                                                                            |
|-----------------------------------|-------------------|----------------------------------------------------------------------|--------|----------------|------|-----------------------|-------------------|-------------------------------------------------------------|---------------------------------------------------------------------------------------------------------|-----------------------------------------------------------------------------------------------------------------------------------------------------------------------------------------|-----------------------------------------------------------------------------------------|------------------------------------|----------------------------------------------------------------------------|
| 2                                 | NM_001012274* +/+ | 2/3                                                                  | 106    | 117            | 998  | MER61A,<br>MER61A-int | ERV1 <sup>3</sup> | chromosome 1<br>open reading frame<br>99 ( <i>C1orf99</i> ) | undefined                                                                                               | BC040856                                                                                                                                                                                | BM452121                                                                                | * GT/AG                            |                                                                            |
| <b>last CDS exon</b>              |                   |                                                                      |        |                |      |                       |                   |                                                             |                                                                                                         |                                                                                                                                                                                         |                                                                                         |                                    |                                                                            |
| 1                                 | NM_013329*        | -/-                                                                  | 16/16* | 114(38)        | 815  | 631                   | MER39B            | ERV1 <sup>1</sup>                                           | chromosome 21<br>open reading frame<br>66 ( <i>C21orf66</i> ),<br>transcript variant 2                  | DNA binding, regulation of<br>DNA-dependent<br>transcription                                                                                                                            | AY033904                                                                                | N/A                                | * acceptor (c & h & r<br>= AG), no flanking<br>donor: last exon of<br>gene |
| 2                                 | NM_015845*        | -/+                                                                  | 14/14* | 190            | 586  | 656                   | MLT2F             | ERVL <sup>1</sup>                                           | methyl-CpG binding<br>domain protein 1<br>( <i>MBD1</i> ), transcript<br>variant 2                      | metal ion binding, methyl-<br>CpG binding, transcription<br>corepressor activity                                                                                                        | AF078831                                                                                | N/A                                | acceptor(c & h & r =<br>AG), no flanking<br>donor: last exon of<br>gene    |
| 3                                 | NM_181538*        | -/-                                                                  | 2/2    | 59             | 279  | 491                   | LTR72B            | ERV1 <sup>1</sup>                                           | gap junction<br>protein, epsilon 1,<br>29kDa ( <i>GJE1</i> )                                            | connexon channel activity                                                                                                                                                               | AF503615,<br>AY297109                                                                   | N/A                                | * acceptor (c & h & r<br>= AG), no flanking<br>donor: last exon of<br>gene |
| 4                                 | NM_001015884      | -/-                                                                  | 4/4    | 33(11)         | 115  | 384                   | MSTA              | MaLR <sup>1</sup>                                           | RPB11b2alpha<br>protein ( <i>POLR2J3</i> )                                                              | undefined                                                                                                                                                                               | AJ277741                                                                                | BI223488,<br>BE936699,<br>DW433233 | * acceptor (c & h & r<br>= AG), no flanking<br>donor: last exon of<br>gene |
| <b>single protein coding exon</b> |                   |                                                                      |        |                |      |                       |                   |                                                             |                                                                                                         |                                                                                                                                                                                         |                                                                                         |                                    |                                                                            |
| 1                                 | NM_001007236      | -/-                                                                  | 1/1    | 5640<br>(1880) | 1879 | 7536                  | HERVK             | ERVK <sup>2</sup>                                           | endogenous<br>retroviral sequence<br>K, 6 ( <i>ERVK6</i> )                                              | aspartic-type<br>endopeptidase activity,<br>metal ion binding, nucleic<br>acid binding, peptidase<br>activity, zinc ion binding,<br>DNA transposition,<br>proteolysis, virus life cycle | Partial CDS: N/A<br>AF080233,<br>DQ069911,<br>DQ069913,<br>U87590,<br>U87591,<br>U87592 | N/A                                | no orthologous<br>exonic sequence in<br>chimpanzee and<br>rhesus monkey    |
| 2                                 | NM_001007236      | -/-<br>(different<br>genomic location<br>from the<br>previous entry) | 1/1    | 5640<br>(1880) | 1879 | 7535                  | HERVK             | ERVK <sup>2</sup>                                           | endogenous<br>retroviral sequence<br>K, 6 ( <i>ERVK6</i> )                                              | aspartic-type<br>endopeptidase activity,<br>metal ion binding, nucleic<br>acid binding, peptidase<br>activity, zinc ion binding,<br>DNA transposition,<br>proteolysis, virus life cycle | Partial CDS: N/A<br>AF080233,<br>DQ069911,<br>DQ069913,<br>U87590,<br>U87591,<br>U87592 | N/A                                | no orthologous<br>exonic sequence in<br>chimpanzee and<br>rhesus monkey    |
| 3                                 | NM_001007253      | -/-                                                                  | 1/1    | 1696           | 564  | 8428                  | HERV3             | ERV1 <sup>2</sup>                                           | endogenous<br>retroviral sequence<br>3 (includes zinc<br>finger protein H-<br>plk/HPF9) ( <i>ERV3</i> ) | unknown                                                                                                                                                                                 | N/A                                                                                     | N/A                                | no orthologous<br>exonic sequence in<br>chimpanzee                         |



- (1) RefSeq gene accession number. The entries marked with asterisk are known protein coding genes with the products listed in SWISS-PROT, TrEMBL, and TrEMBL-NEW and their corresponding mRNAs presented in the GenBank records. The adjacent entries in gray shading indicate the redundant exons, exons with exact or overlap boundaries participated in different alternative transcripts (derived from the same LRTS). Item 10-14 of internal protein coding exons could be the result of duplication of genes or gene regions, rather than direct LTR element insertion.
- (2) Orientation of gene and LRTS assigned as gene strand/ LRTS strand. +, sense strand; -, antisense strand
- (3) The position of exon on a gene/ total number of exons. The asterisk indicates the alternatively spliced exon (exons which are not present in all transcript variants).
- (4) The length of LRTS-derived exon. In case of length divisible by three, the number in parenthesis shows the length of additional amino acid sequence provided by LRTS.
- (5) The length of LRTS fragment covering the exon.
- (6) Class/ family of LRTS. The superscript number refers to the part of LRTS covering an exon. 1, only LTR; 2, only internal sequence (sequence between flanking LTRs containing traditional viral genes); 3, both LTR and internal sequence.
- (7) Gene descriptions according to the Gene Ontology (GO). undefined: no match for the gene in GO. unknown: gene product whose process, function, or localization is not known or cannot be inferred.
- (8) GenBank mRNAs and (9) ESTs confirming the existence of LRTS-derived exon in human. Data were derived from the UCSC genome browser and the Entrez Gene.
- (10) Sequences in place of splice sites flanking the LRTS-derived exon compared between human (May 2004, hg17), chimpanzee (Nov 2003, panTro1) and rhesus monkey (Jan 2006, rheMac2). h, human; c, chimpanzee; r, rhesus monkey. The data were derived from the multiple sequence alignment of the target exon of human and homologous sequences of chimpanzee and rhesus monkey retrieved from the UCSC genome browser. The entries marked with asterisk suggest possible primate-specific LTR element insertion (the homologous LRTS regions are present in chimpanzee and rhesus monkey but not in other vertebrates; mouse, rat, rabbit, dog, cow, armadillo, elephant, tenrec, opossum, chicken, frog, zebrafish, tetraodon, fugu).
